# Supplementary material
Source: ML conference proceedings conference paper supplement (https://openreview.net/forum?id=4A5IQEjG8c)
Supplement: supplementary_material [file attachment]

---

# Slack-Free Spiking Neural Network Formulation for Hypergraph Minimum Vertex Cover Supplementary Material

---

Anonymous Author(s)

Affiliation

Address

email

## 1 Derivation of Problem 1

Recall the QUBO for MVC

$$\min_{\mathbf{z} \in \{0,1\}^N} \|\mathbf{z}\|_2^2 + \lambda \sum_{k=1}^K (1 - z_{i(k)})(1 - z_{j(k)}). \quad (1)$$

We expand

$$\|\mathbf{z}\|_2^2 + \lambda \sum_{k=1}^K (1 - z_{i(k)})(1 - z_{j(k)}) \quad (2)$$

$$= \sum_{i=1}^N z_i^2 - \lambda \sum_{k=1}^K z_{i(k)} - \lambda \sum_{k=1}^K z_{j(k)} + \lambda \sum_{k=1}^K z_{i(k)} \cdot z_{j(k)} + \text{constant} \quad (3)$$

$$= \sum_{i=1}^N z_i^2 - \lambda \sum_{k=1}^K z_{i(k)}^2 - \lambda \sum_{k=1}^K z_{j(k)}^2 + \lambda \sum_{k=1}^K z_{i(k)} \cdot z_{j(k)} + \text{constant} \quad (4)$$

$$= \sum_{i=1}^N (1 - \lambda \cdot \deg(i)) \cdot z_i^2 + \lambda \sum_{k=1}^K z_{i(k)} \cdot z_{j(k)} + \text{constant} \quad (5)$$

$$= \mathbf{z}^T \mathbf{Q} \mathbf{z} + \text{constant} \quad (6)$$

where,

- Eq. (4) is obtained due to  $z_i \in \{0, 1\}$ , thus  $z_i = z_i^2$ .
- In Eq. (5),  $\deg(\cdot)$  denotes the degree of  $i$ -th vertex.
- In Eq. (6),  $\mathbf{Q}_{i,i} = (1 - \lambda \cdot \deg(i))$  for all  $i = 1, \dots, N$ , and  $\mathbf{Q}_{i(k),j(k)} = \lambda$  for all  $k = 1, \dots, K$

## 2 Derivation of Problem 2

Recall the QUBO for HMVC

$$\min_{\mathbf{z} \in \{0,1\}^N, \{\mathbf{y}^{(k)}\}_{k=1}^K \in \{0,1\}^{r' \times K}} \|\mathbf{z}\|_2^2 + \lambda \sum_{k=1}^K \left( \mathbf{b}^{(k)T} \mathbf{z} - \mathbf{1}_{r'}^T \mathbf{y}^{(k)} - 1 \right)^2, \quad (7)$$

11 We define  $\mathbf{x} = \begin{bmatrix} \mathbf{z} \\ \mathbf{y}^{(1)} \\ \vdots \\ \mathbf{y}^{(K)} \end{bmatrix} \in \{0, 1\}^{N+r'K}$

12 First, as  $z_i$  is a binary variable, thus  $z_i = z_i^2$ , the first term of Eq. (7) can be rewritten

$$\|\mathbf{z}\|_2^2 = \sum_{i=1}^N z_i = [\mathbf{x}^T \quad 1] \cdot \mathbf{J} \cdot \begin{bmatrix} \mathbf{x} \\ 1 \end{bmatrix} \quad (8)$$

13 with  $\mathbf{J} = \begin{bmatrix} \mathbf{I}_N & \mathbf{0}_{N \times (r'K+1)} \\ \mathbf{0}_{(r'K+1) \times N} & \mathbf{0}_{(r'K+1) \times (r'K+1)} \end{bmatrix}$ , where  $\mathbf{0}$  is a zero matrix with the size specified in its  
14 subscript, and  $\mathbf{I}_N$  is the  $N \times N$  identity matrix.

15 Next, we rewrite the second term of Eq. (7) as

$$\sum_{k=1}^K \left( \mathbf{b}^{(k)T} \mathbf{z} - \mathbf{1}_{r'}^T \mathbf{y}^{(k)} - 1 \right)^2 = [\mathbf{x}^T \quad 1] \mathbf{H}^T \mathbf{H} \begin{bmatrix} \mathbf{x} \\ 1 \end{bmatrix}, \quad (9)$$

16 with  $\mathbf{H} = [\mathbf{A}^T \quad -\mathbf{S} \quad -\mathbf{1}_K] \in \{0, 1\}^{K \times (N+r'K+1)}$ , where  $\mathbf{A} = [\mathbf{b}^{(1)} \quad \dots \quad \mathbf{b}^{(K)}] \in$   
17  $\{0, 1\}^{N \times K}$ ,  $\mathbf{S} = \mathbf{I}_K \otimes \mathbf{1}_{r'}^T$  is the Kronecker product,  $\mathbf{I}_K$  is a  $K \times K$  identity matrix, and  $\mathbf{1}$  is  
18 an all-ones vector with the size specified in its subscript.

19 Combining Eqs. (8) and (9), the optimization problem (7) can be rewritten as

$$\min_{\mathbf{x} \in \{0, 1\}^{N+r'K}} [\mathbf{x}^T \quad 1] \mathbf{Q} \begin{bmatrix} \mathbf{x} \\ 1 \end{bmatrix}, \quad (10)$$

20 where  $\mathbf{Q} = \mathbf{J} + \lambda \mathbf{H}^T \mathbf{H}$ .

21 However, the problem (10) still has the constant 1 in the the variable, which can be removed using  
22 the following transformation

23 Suppose

$$\mathbf{x} = [x_1 \quad x_2 \quad x_3] \quad (11)$$

$$\mathbf{Q} = \begin{bmatrix} q_{11} & q_{12} & q_{13} & q_{14} \\ 0 & q_{22} & q_{23} & q_{24} \\ 0 & 0 & q_{33} & q_{34} \\ 0 & 0 & 0 & q_{44} \end{bmatrix}. \quad (12)$$

24 We then take the last column of  $\mathbf{Q}$  except the last element  $q_{44}$ , which yields  $\mathbf{q} = [q_{14} \quad q_{24} \quad q_{34}]^T$ .  
25 Next, we add  $\mathbf{q}$  to the diagonal of  $\mathbf{Q}$

$$\mathbf{Q}' = \begin{bmatrix} q_{11} + q_{14} & q_{12} & q_{13} \\ 0 & q_{22} + q_{24} & q_{23} \\ 0 & 0 & q_{33} + q_{34} \end{bmatrix}. \quad (13)$$

26 Since  $\mathbf{x}$  is a binary vector, i.e.,  $x_i^2 = x_i$ , we can obtain

$$[\mathbf{x}^T \quad 1] \mathbf{Q} \begin{bmatrix} \mathbf{x} \\ 1 \end{bmatrix} = \mathbf{x}^T \mathbf{Q}' \mathbf{x} + q_{44}. \quad (14)$$

27 Apply the transformation described from Eq. (11) to Eq. (14) into the problem (10), we can obtain  
28 the standard QUBO form

$$\min_{\mathbf{x} \in \{0, 1\}^{N+r'K}} \mathbf{x}^T \mathbf{Q}' \mathbf{x} + \text{constant}, \quad (15)$$
